# Supplementary material for: Seasonal shift in timing of vernalization as an adaptation to extreme winter
Source: eLife journal article supplement (doi:10.7554/elife.06620), 2015-07-23
Supplement: supp [file elife-06620-supp-v1.zip]

Archive with 14 entries (14 files):
- elife_poa_e06620_Figure_3_figure_supplement_5.pdf
- elife_poa_e06620_Figure_3_source_data_1.pdf
- elife_poa_e06620_Figure_1_figure_supplement_1.pdf
- elife_poa_e06620_Figure_1_figure_supplement_2.pdf
- elife_poa_e06620_Figure_3_figure_supplement_6.pdf
- elife_poa_e06620_Figure_3_figure_supplement_7.pdf
- elife_poa_e06620_Figure_4_figure_supplement_1.pdf
- elife_poa_e06620_Figure_2_source_data_1.pdf
- elife_poa_e06620_Figure_3_figure_supplement_4.pdf
- elife_poa_e06620_Figure_3_figure_supplement_2.pdf
- elife_poa_e06620_Figure_3_figure_supplement_1.pdf
- elife_poa_e06620_Figure_4_source_data_1.docx
- elife_poa_e06620_Figure_2_figure_supplement_1.pdf
- elife_poa_e06620_Figure_3_figure_supplement_3.pdf
