# Supplementary material for: Seasonal shift in timing of vernalization as an adaptation to extreme winter
Source: eLife journal article supplement (doi:10.7554/elife.06620), 2015-07-23
Supplement: supp [file elife-06620-supp-v1.zip › elife_poa_e06620_Figure_1_figure_supplement_1.pdf]

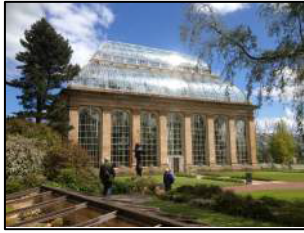

Edinburgh, Scotland  
Botanical Garden  
**Edi-0**

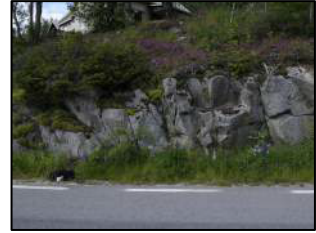

Lövvik, N. Sweden  
Roadside  
**Lov-1**

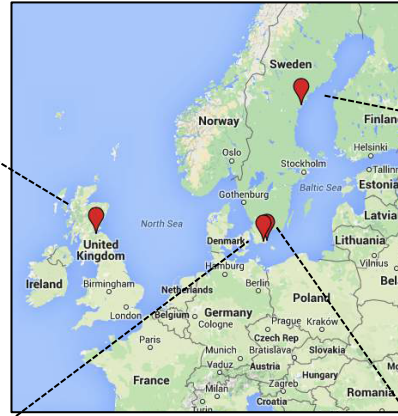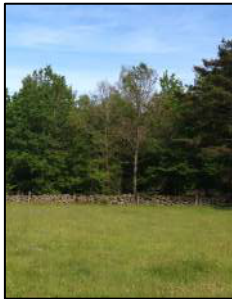

Ullstorp,  
S. Sweden  
Meadow  
**UII2-5**

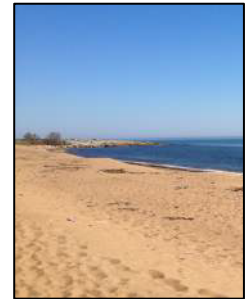

Vårhallen,  
S. Sweden  
Beach  
**Var2-6**
