# Supplementary material for: Seasonal shift in timing of vernalization as an adaptation to extreme winter
Source: eLife journal article supplement (doi:10.7554/elife.06620), 2015-07-23
Supplement: supp [file elife-06620-supp-v1.zip › elife_poa_e06620_Figure_2_source_data_1.pdf]

## Figure 2 – source data 1

Primers used for qPCR ChIP.

| Primers                  | Sequence (5'-3')                                     |
|--------------------------|------------------------------------------------------|
| -2429_F<br>-2376_R       | ATCCAGAAAAGGGCAAGGAG<br>CGAATCGATTGGGTGAATG          |
| -1708_F<br>-1639_R       | TGGAGGGAACAACCTAATGC<br>TCATTGGACCAAACCAAACC         |
| -501_F<br>-381_R         | ACTATGTAGGCACGACTTTGGTAAC<br>TGCAGAAAGAACCTCCACTCTAC |
| -158_F<br>-56_R          | GCCCGACGAAGAAAAAGTAG<br>TCCTCAGGTTTGGGTTCAAG         |
| 307_F<br>393_R           | GGCGGATCTCTTGTTGTTTC<br>CTTCTTCACGACATTGTTCTTCC      |
| 543_F<br>700_R           | CGTGCTCGATGTTGTTGAGT<br>TCCCGTAAGTGCATTGCATA         |
| 1424_F<br>1561_R         | TTGACAATCCACAACCTCAATC<br>TCAATTCCTAGAGGCACCAA       |
| 2356_F<br>2451_R         | AGTTTGGCTTCCTCATACTTATGG<br>CAATGAACCTTGAGGACAAGG    |
| 3088_F<br>3224_R         | GGGGCTGCGTTTACATTTTA<br>GTGATAGCGCTGGCTTTGAT         |
| 4213_F<br>4360_R         | AGAACAACCGTGCTGCTTTT<br>TGTGTGCAAGCTCGTTAAGC         |
| 5030_F<br>5135_R         | CCGGTTGTTGGACATAACTAGG<br>CCAAACCCAGACTTAACCAGAC     |
| 6768_F<br>6838_R         | TTGTAAAGTCCGATGGAGACG<br>ACTCGGCGAGAAAGTTTGTG        |
| STM exon F<br>STM exon R | GCCCATCATGACATCACATC<br>GGGAACTACTTTGTTGGTGGTG       |
