# Supplementary material for: Seasonal shift in timing of vernalization as an adaptation to extreme winter
Source: eLife journal article supplement (doi:10.7554/elife.06620), 2015-07-23
Supplement: supp [file elife-06620-supp-v1.zip › elife_poa_e06620_Figure_3_figure_supplement_5.pdf]

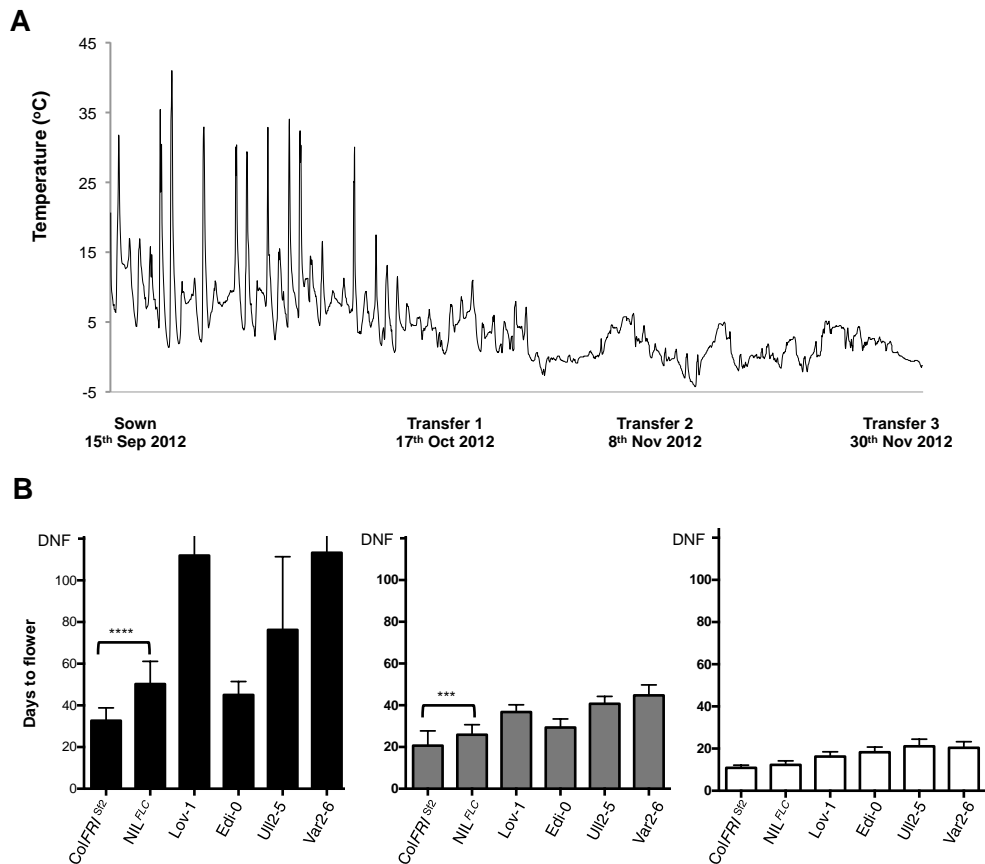

**Figure 3 – figure supplement 5**

**Sweden field experiments results 2012. (A)** Date of sowing and plant transfers to the greenhouse are shown with hourly soil surface temperatures recorded during autumn 2012. **(B)** Days to flower recorded after plants were transferred to a warmed greenhouse at three time points during autumn: Transfer 1 (black), Transfer 2 (grey) and Transfer 3 (white).  $n \geq 10$ . Error bars represent  $\pm$  S.D. Mann-Whitney  $U$  test results: \*\*\*\* $p < 0.0001$  ( $U$  value: 10.50), \*\*\* $p = 0.0009$  ( $U$  value: 34).  $n \geq 14$ . DNF = Did Not Flower.
