# Supplementary material for: Seasonal shift in timing of vernalization as an adaptation to extreme winter
Source: eLife journal article supplement (doi:10.7554/elife.06620), 2015-07-23
Supplement: supp [file elife-06620-supp-v1.zip › elife_poa_e06620_Figure_3_figure_supplement_6.pdf]

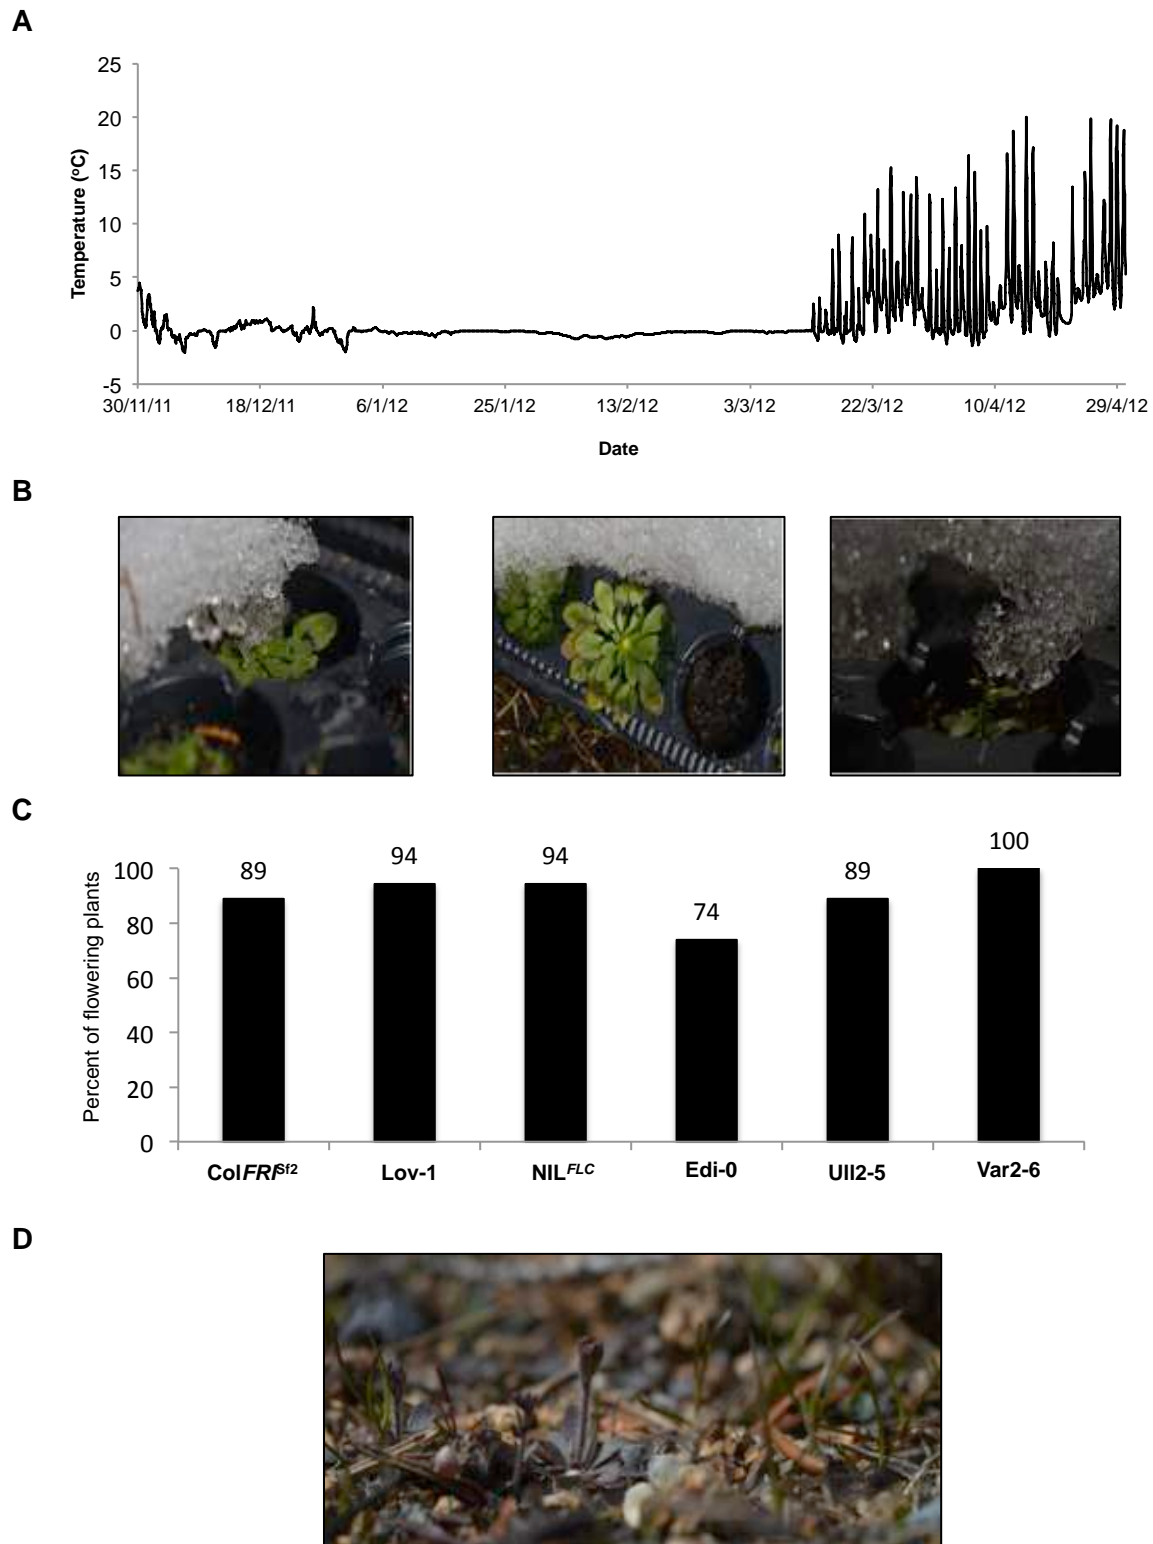

**Figure 3 – figure supplement 6**

**Plants flowered synchronously with natural populations after 5 months of continuous snow cover. (A)** Surface temperature recorded at Ramsta indicating that overwintered plants were continuously covered by snow during winter 2012. **(B)** Representative images of the overwintered cohort with floral buds visible. **(C)** Percentage plants with visible buds on 26<sup>th</sup> April 2013, 5 days after snowmelt and **(D)** Image of natural population taken 26<sup>th</sup> April 2013.
