# Supplementary material for: Seasonal shift in timing of vernalization as an adaptation to extreme winter
Source: eLife journal article supplement (doi:10.7554/elife.06620), 2015-07-23
Supplement: supp [file elife-06620-supp-v1.zip › elife_poa_e06620_Figure_3_figure_supplement_7.pdf]

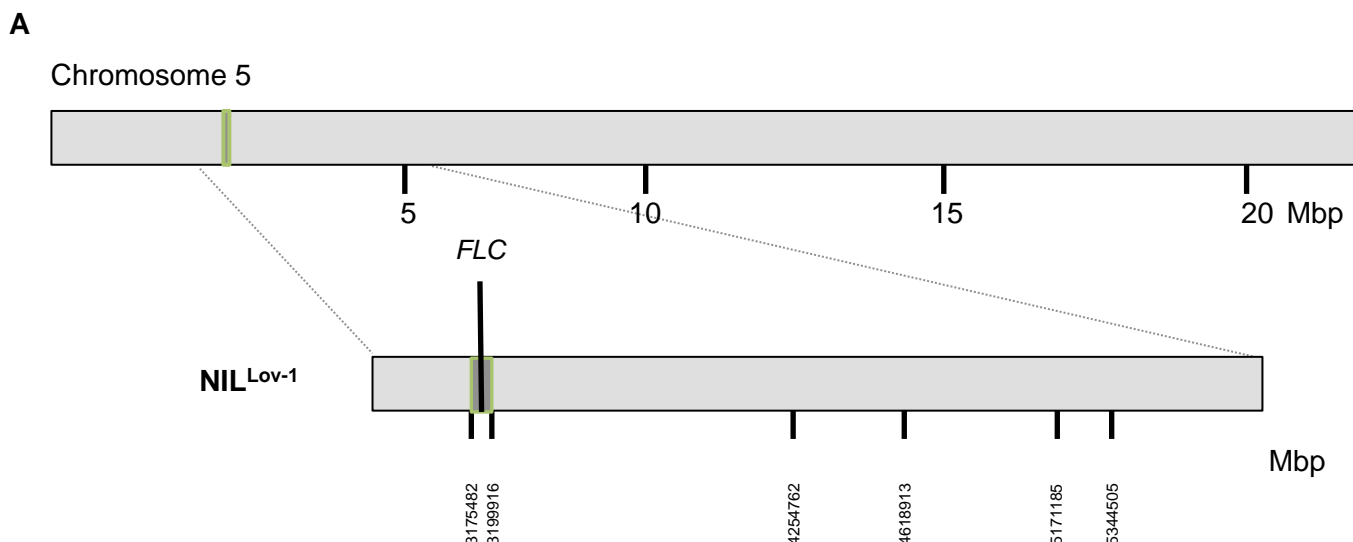

**B**

| Type | Position (bp) | Enzyme | Product (bp) | Digest | Forward (5'-3')                | Reverse (5'-3')                 |
|------|---------------|--------|--------------|--------|--------------------------------|---------------------------------|
| SSLP | 3175482       | -      | 472/442      | -      | TATATGCACGTCCGGGAGAT           | GAGGCACCAAAGAAACAAGG            |
| CAPS | 3199916       | SacII  | 625          | Col    | GACACCCGCGATTCATCAGTC          | GGGATCATCAGGTAATCCGATA          |
| SSLP | 4254762       | -      | 249/<br><249 | -      | CCCAGTCTAACCACGACCAC           | AATCCCAGTAACCAAACACACA          |
| SSLP | 4618913       | -      | 164/212      | -      | TCACAAAGGCCTAAGAACCAA          | TTTAGGACATGAGTAATGTGCATC        |
| CAPS | 5171185       | AluI   | 310          | Lov-1  | AAACCTTGTGGATTACAACCTCG<br>AGT | TATGATGAAAGAATTCACCCCTGCA<br>GC |
| SSLP | 5344505       | -      | 100/<br><100 | -      | AGGGGAAAAAGCGGACTAGA           | TGCTCAGGCATAAGAAGAGC            |

**Figure 3 – figure supplement 7**

**Genetic map showing Lov-1 introgressed region on chromosome 5. (A)** Vertical lines indicate PCR-based markers used to distinguish between Col-0 (light grey) and Lov-1 (dark grey) regions. NIL<sup>Lov-1</sup> introgression line contains the Lov-1 *FLC* locus (region outlined in green). **(B)** Markers used to map the introgressed regions on Chromosome 5. The positions correspond to AGI coordinates. Where the marker is a simple sequence length polymorphism (SSLP), the product size is shown for Col-0/ Lov-1. Where the marker is a Cleaved Amplified Polymorphic sequence (CAPS), the enzyme required to digest the PCR product of the specified accession is given.
