# Supplementary material for: Seasonal shift in timing of vernalization as an adaptation to extreme winter
Source: eLife journal article supplement (doi:10.7554/elife.06620), 2015-07-23
Supplement: supp [file elife-06620-supp-v1.zip › elife_poa_e06620_Figure_3_source_data_1.pdf]

---

**Figure 3 – source data 1**

Developmental stage of natural *Arabidopsis thaliana* populations in spring in the High Coast area of N. Sweden (62.5°N)

---

| Pop.           | Sampling | RW  | RWO  | New germinants |
|----------------|----------|-----|------|----------------|
| <hr/>          |          |     |      |                |
| Ådal           | T 13     | 58  | 0    | 0              |
| Högsjö         | T 20     | 260 | 2*   | 0              |
| Alnö, Hovid I  | A        | 50  | 0    | 0              |
| Alnö, Hovid II | A        | 55  | 0    | 0              |
| Eden, road I   | A        | 63  | 1+5* | 0              |
| Eden, road II  | A        | 31  | 1#   | 0              |
| Lövvik         | T 4      | 39  | 0    | 0              |
| Lövvik         | A        | 285 | 1+3# | 0              |
| Total          |          | 841 | 13*# | 0              |

---

- partly decomposed and dying plants

# located under other plants

Number of *Arabidopsis thaliana* rosettes with visible buds or inflorescence (RW), rosettes without a visible bud or inflorescence (RWO), newly germinated seedlings. Plants were assessed every 0.5 m along a transect (T n) in squares (14.5 cm x 19.5 cm) or in an area (A) of ~ 1 m<sup>2</sup>. Scoring was undertaken five to six weeks after snowmelt in natural populations in the High coast area of Sweden (2-6<sup>th</sup> May 2015).

Population size was ~2000 – 3000 in both Ådal and Högsjö, 1000-2000 in Lövvik and all plants were recorded in Eden and the main part in Hovid.

A transect was possible to set up in Ådal and Högsjö but not in Eden and Hovid.
