# Supplementary material for: Seasonal shift in timing of vernalization as an adaptation to extreme winter
Source: eLife journal article supplement (doi:10.7554/elife.06620), 2015-07-23
Supplement: supp [file elife-06620-supp-v1.zip › elife_poa_e06620_Figure_4_figure_supplement_1.pdf]

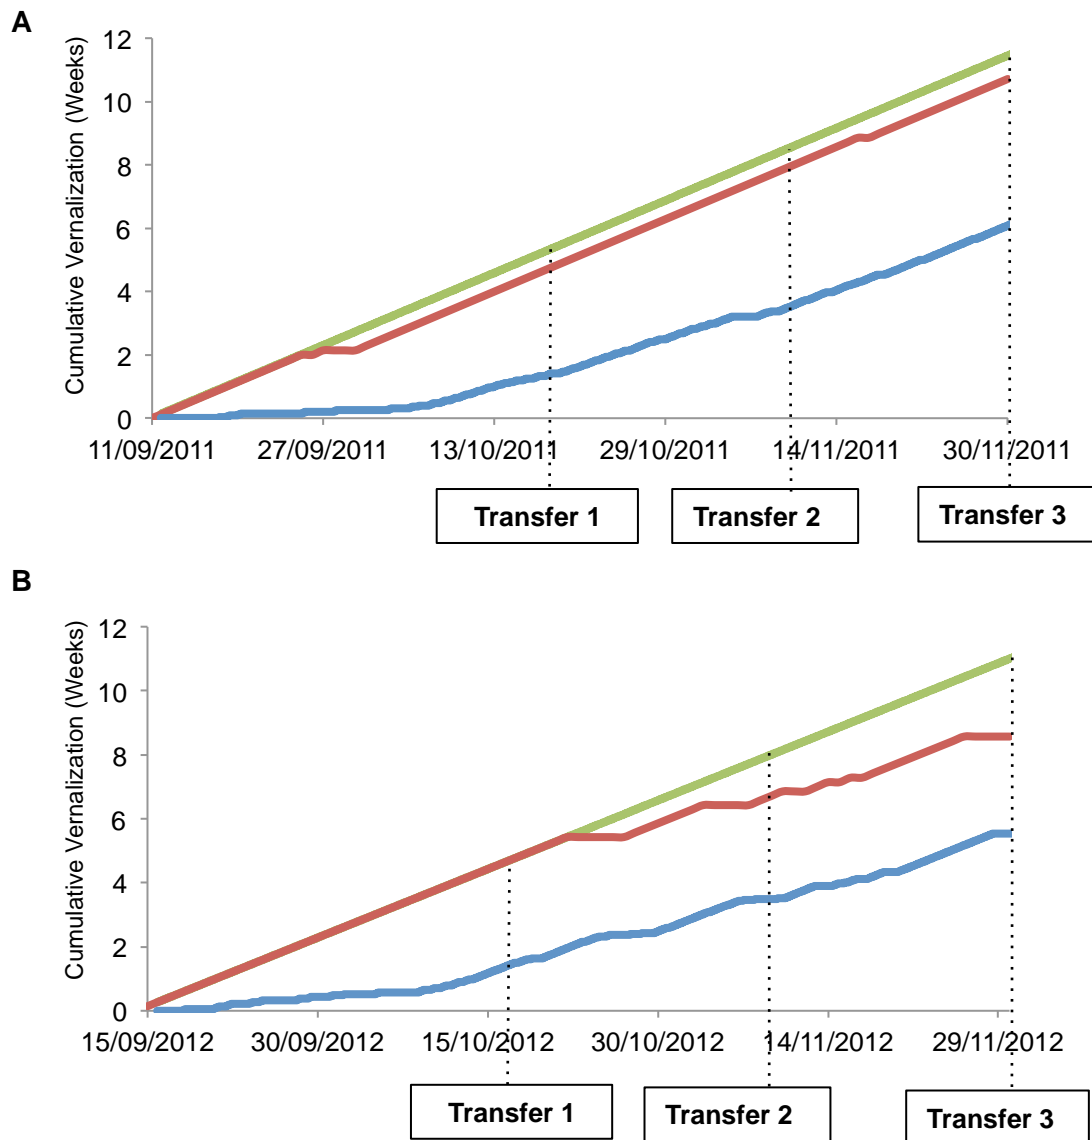

**Figure 4 – figure supplement 1**

**Accumulation of temperatures within different effective vernalization ranges.**

**(A)** Predicted accumulation of effective vernalization weeks during 2011 and **(B)** 2012 field experiments. Red and blue lines indicate accumulated hours  $>0-6^{\circ}\text{C}$  and daily average temperatures  $>0-15^{\circ}\text{C}$  respectively. The green line indicates maximal temperature accumulation under constant  $8^{\circ}\text{C}$  growing conditions.
