# Supplementary material for: Seasonal shift in timing of vernalization as an adaptation to extreme winter
Source: eLife journal article supplement (doi:10.7554/elife.06620), 2015-07-23
Supplement: supp [file elife-06620-supp-v1.zip › elife_poa_e06620_Figure_4_source_data_1.docx]

**Figure 4 – source data 1**

Cabinet flowering time data were selected where conditions most closely matched mean temperatures recorded during 2011 and 2012 field experiments.

| **2011** | | | | | |
| --- | --- | --- | --- | --- | --- |
| Field Temperatures | | | | | |
| Weeks after sowing | 4 | 5 | 6 | 8 | 12 |
| Cumulative  average  temperature | 12.48oC | 10.82oC | 9.72oC | 8.40oC | 6.42oC |
| Selected Cabinet Data | | | | | |
| Weeks vernalization | 4 | 5 | 6 | 8 | 12 |
| Constant temperature | 12oC | 10oC | 8oC | 8oC | 5oC |

| **2012** | | | | |
| --- | --- | --- | --- | --- |
| Field Temperatures | | | | |
| Weeks after sowing | 4 | 6 | 8 | 12 |
| Cumulative  average  temperature | 9.49oC | 7.34oC | 5.61oC | 4.55oC |
| Selected Cabinet Data | | | | |
| Weeks vernalization | 4 | 6 | 8 | 12 |
| Constant temperature | 8oC | 8oC | 5oC | 5oC |
