# Supplementary figures and images for: Seasonal shift in timing of vernalization as an adaptation to extreme winter
Source: eLife journal article supplement (doi:10.7554/elife.06620), 2015-07-23

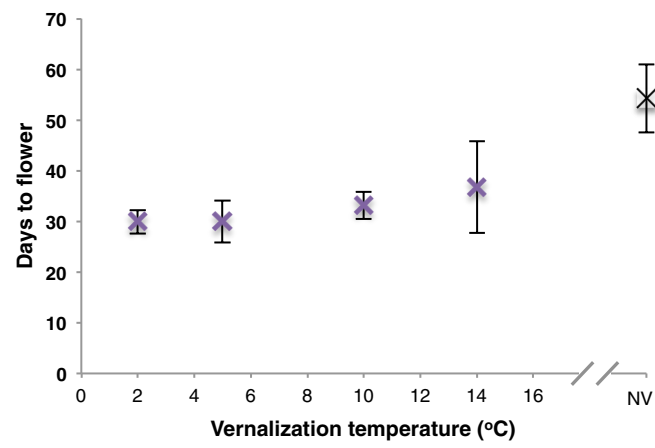

Supplement: supp [file elife-06620-supp-v1.zip › elife_poa_e06620_Figure_1_figure_supplement_2.pdf]

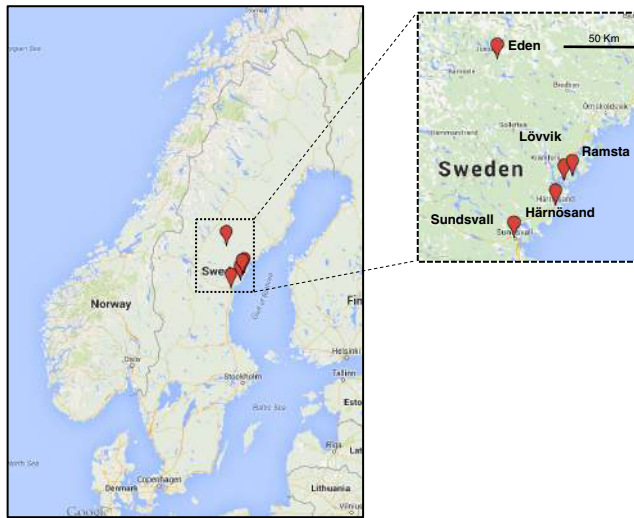

Supplement: supp [file elife-06620-supp-v1.zip › elife_poa_e06620_Figure_3_figure_supplement_4.pdf]

**A**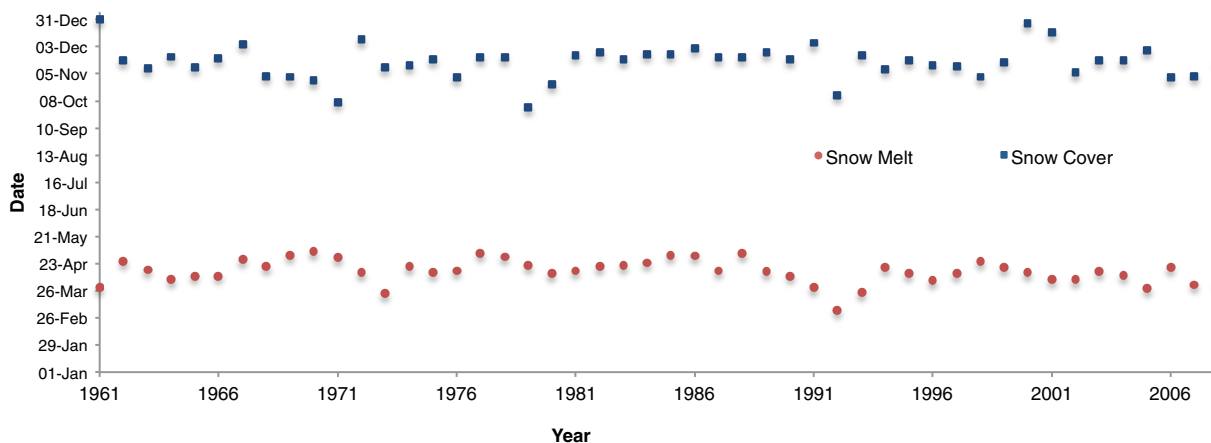**B**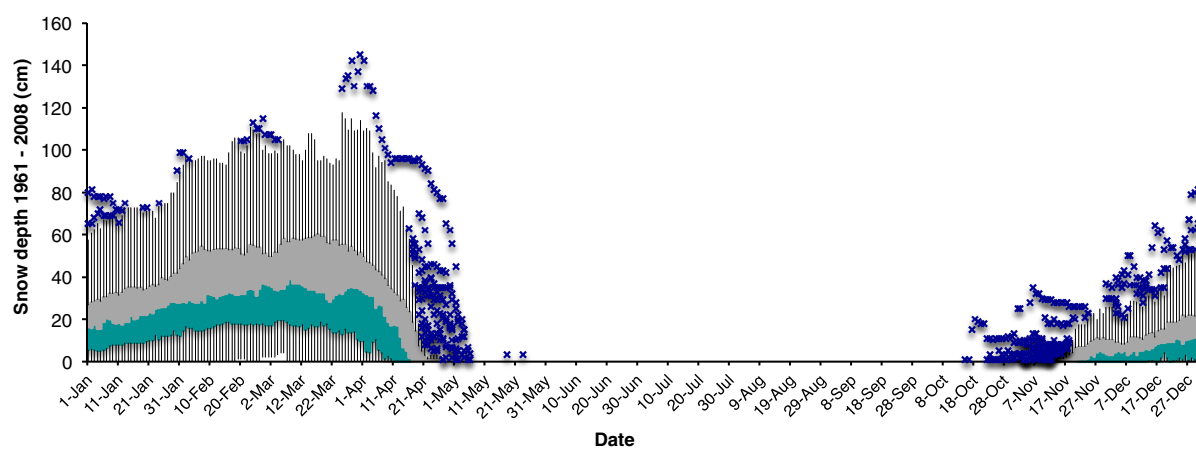**C**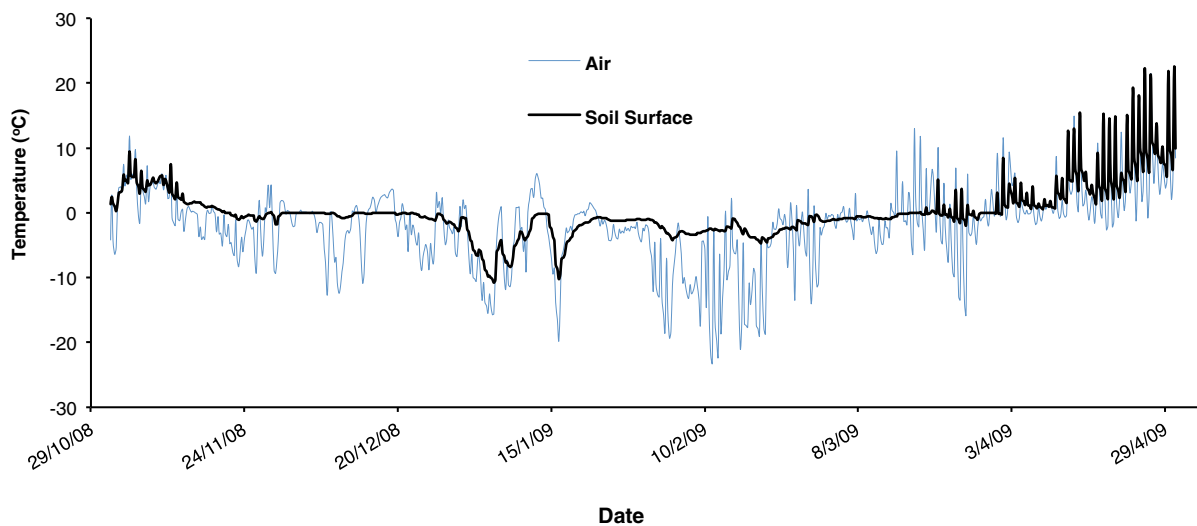

Supplement: supp [file elife-06620-supp-v1.zip › elife_poa_e06620_Figure_3_figure_supplement_2.pdf]

**A**

24th October 2008

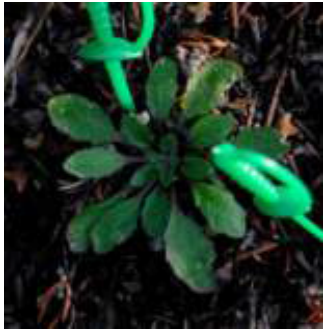

**B**

9th April 2009

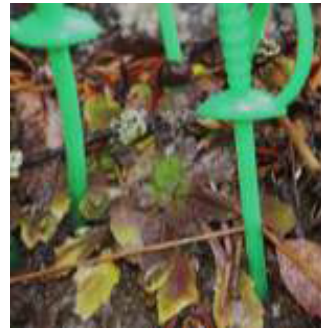

**C**

25th April 2009

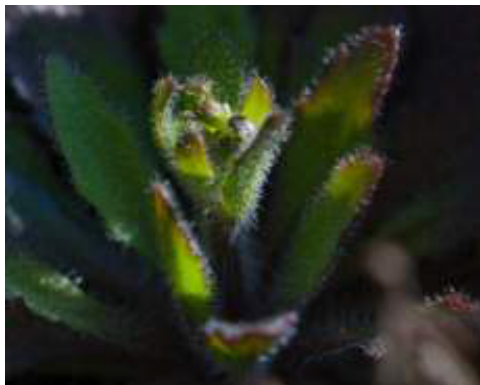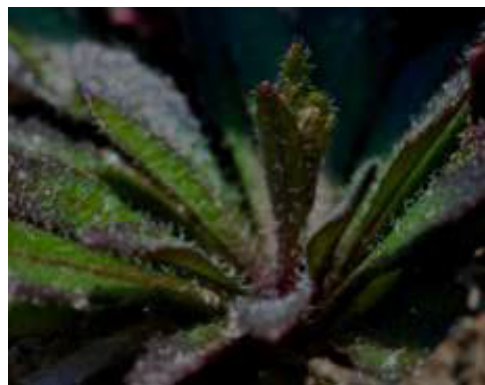

Supplement: supp [file elife-06620-supp-v1.zip › elife_poa_e06620_Figure_3_figure_supplement_1.pdf]

**A**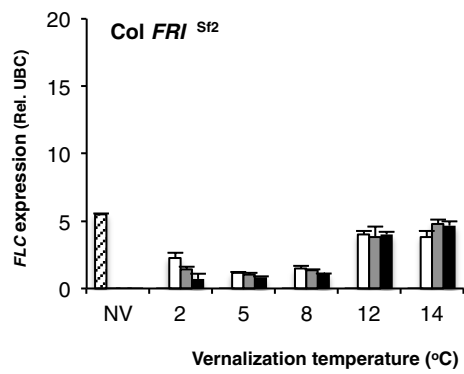**B**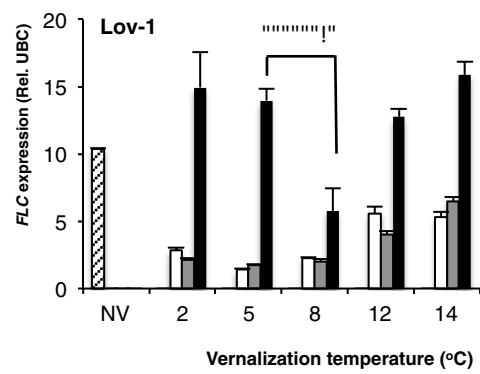

Supplement: supp [file elife-06620-supp-v1.zip › elife_poa_e06620_Figure_2_figure_supplement_1.pdf]

**A**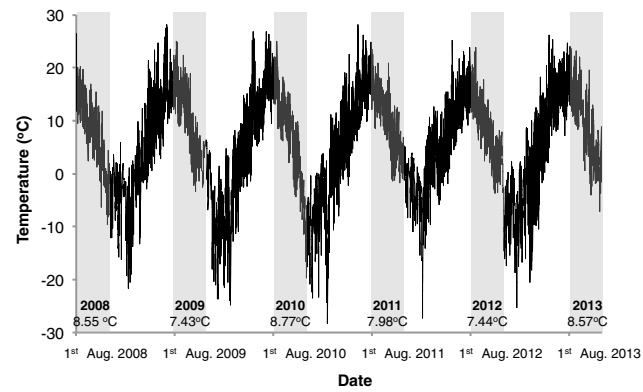**B**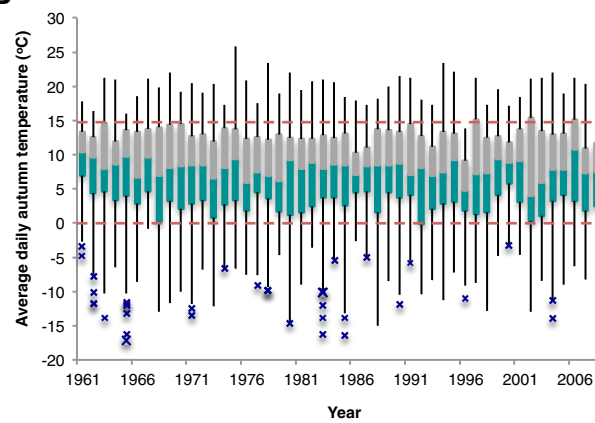

Supplement: supp [file elife-06620-supp-v1.zip › elife_poa_e06620_Figure_3_figure_supplement_3.pdf]
